# Supplementary material for: Low-defect-density WS2 by hydroxide vapor phase deposition
Source: PubMed Central journal article supplement (PMC9293887; doi:10.1038/s41467-022-31886-0), 2022-07-18
Supplement: 41467_2022_31886_MOESM1_ESM.pdf [file 41467_2022_31886_MOESM1_ESM.pdf]

# Low-defect-density WS<sub>2</sub> by hydroxide vapor phase deposition

Yi Wan<sup>1,2</sup>, En Li<sup>3</sup>, Zhihao Yu<sup>4,5</sup>, Jing-Kai Huang<sup>6</sup>, Ming-Yang Li<sup>4</sup>, Ang-Sheng Chou<sup>4</sup>, Yi-Te Lee<sup>7</sup>, Chien-Ju Lee<sup>7</sup>, Hung-Chang Hsu<sup>8</sup>, Qin Zhan<sup>9</sup>, Areej Aljarb<sup>10</sup>, Jui-Han Fu<sup>1,11</sup>, Shao-Pin Chiu<sup>7</sup>, Xinran Wang<sup>5</sup>, Juhn-Jong Lin<sup>7</sup>, Ya-Ping Chiu<sup>8</sup>, Wen-Hao Chang<sup>7,12</sup>, Han Wang<sup>4</sup>, Yumeng Shi<sup>13</sup>, Nian Lin<sup>3</sup>, Yingchun Cheng<sup>9\*</sup>, Vincent Tung<sup>1,11\*</sup>, Lain-Jong Li<sup>2\*</sup>

<sup>1</sup>Physical Sciences and Engineering Division, King Abdullah University of Science and Technology (KAUST), Thuwal, Kingdom of Saudi Arabia

<sup>2</sup>Department of Mechanical Engineering, The University of Hong Kong, Pokfulam Road, Hong Kong

<sup>3</sup>Department of Physics, The Hong Kong University of Science and Technology, Hong Kong

<sup>4</sup>Corporate Research, Taiwan Semiconductor Manufacturing Company (TSMC), 168 Park Ave. 2, Hsinchu Science Park, Hsinchu 30075, Taiwan.

<sup>5</sup>National Laboratory of Solid State Microstructures, School of Electronic Science and Engineering and Collaborative Innovation Center of Advanced Microstructures, Nanjing University, Nanjing 210093, China

<sup>6</sup>School of Materials Science and Engineering, University of New South Wales, Sydney, New South Wales, Australia

<sup>7</sup>Department of Electrophysics, National Yang Ming Chiao Tung University, Hsinchu 30010, Taiwan.

<sup>8</sup>Department of Physics, National Taiwan University, Taipei 10617, Taiwan

<sup>9</sup>Key Laboratory of Flexible Electronics & Institute of Advanced Materials, Nanjing Tech University, Nanjing, 211816, China

<sup>10</sup>Department of Physics, King Abdulaziz University (KAU), Jeddah 23955-6900, Saudi Arabia

<sup>11</sup>Department of Chemical System and Engineering, The University of Tokyo, Tokyo, 113-8654, Japan

<sup>12</sup>Research Center for Applied Sciences, Academia Sinica, Taipei 11529, Taiwan

<sup>13</sup>International Collaborative Laboratory of 2D Materials for Optoelectronic Science & Technology of Ministry of Education, Engineering Technology Research Center for 2D Material Information Function Devices and Systems of Guangdong Province, College of Optoelectronic Engineering, Shenzhen University, Shenzhen, 518060, China

\*To whom correspondence should be addressed: [lanceli1@hku.hk](mailto:lanceli1@hku.hk) or [vincent.tung@kaust.edu.sa](mailto:vincent.tung@kaust.edu.sa) or [iameycccheng@nitech.edu.cn](mailto:iameycccheng@nitech.edu.cn)

## Cotents

### I. Supplementary Notes

- Supplementary Note 1. OHVPD growth mechanism
- Supplementary Note 2. PL and Raman mapping results
- Supplementary Note 3. Discussion of OHVPD growth condition

### II. Supplementary Figures

- Supplementary Figure 1. Reaction of W metals with H<sub>2</sub>O and/or H<sub>2</sub> by XRD
- Supplementary Figure 2. Hydrogen effect investigation in the OHVPD process
- Supplementary Figure 3. Kinetic simulation of sulfurization process
- Supplementary Figure 4. PL and Raman mapping of OHVPD-WS<sub>2</sub> monolayer
- Supplementary Figure 5. Photoluminescence comparison between CVD- and OHVPD-WS<sub>2</sub> monolayers
- Supplementary Figure 6. OHVPD-MoS<sub>2</sub>
- Supplementary Figure 7. STM/STS for sulfur vacancy
- Supplementary Figure 8. STM/STS for O<sub>s</sub> defect
- Supplementary Figure 9. STM/STS for negatively charged defect (NCD)
- Supplementary Figure 10. Simulation of O<sub>s</sub> defect formation
- Supplementary Figure 11. Electrical performance of CVD-WS<sub>2</sub> monolayers
- Supplementary Figure 12. Theoretical fitting of  $\mu$ -T characteristic for OHVPD- and CVD-WS<sub>2</sub> devices
- Supplementary Figure 13. Summary of reported  $N_{tr}$  and  $N_{Cl}$  for MoS<sub>2</sub> and WS<sub>2</sub> monolayers with different fabrication technologies
- Supplementary Figure 14. Typical dual-sweep transfer curve characteristics of OHVPD-WS<sub>2</sub> monolayer device
- Supplementary Figure 15. Benchmarking field-effect mobility for WS<sub>2</sub> monolayers based on two-probe measurements
- Supplementary Figure 16. The output characteristics of the short-gate-length (100 nm) FET based on OHVPD-WS<sub>2</sub>.
- Supplementary Figure 17. Temperature and PL distributions
- Supplementary Figure 18. Water vapor supply influence

### III. Supplementary Tables

- Supplementary Table 1. Benchmarking FET performance of monolayer TMDCs

### IV. Supplementary References

## I. Supplementary Notes

### Supplementary Note 1: OHVPD growth mechanism.

To reveal the WS<sub>2</sub> growth mechanism with OHVPD, the W foils were heated in different gas environments and characterized by X-ray Diffraction (XRD). Firstly, the W metal foil was annealed at 1050°C, where the H<sub>2</sub>O was brought to the chamber with Ar purge (180 sccm) at atmospheric pressure. After cooling to room temperature, the XRD spectrum was collected (**Supplementary Figure 1a**), and the XRD result displays both W peaks and complex tungsten oxides (WO<sub>x</sub>) peaks which include W<sub>18</sub>O<sub>49</sub> and tungstite (WO<sub>2</sub>(OH)<sub>2</sub>). The oxidation reaction steps of W metal with moisture gas for the WS<sub>2</sub> growth can be written as following<sup>1</sup>:

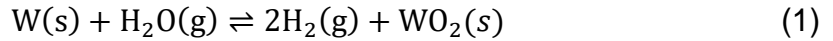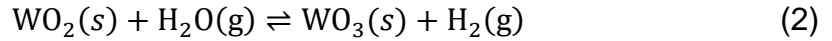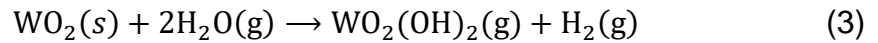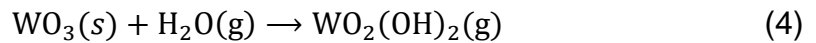

A separate and comparative experiment was performed to understand the role of H<sub>2</sub> gas in the reaction, where a W foil was annealed at the same temperature with an extra H<sub>2</sub> gas (10%), and the XRD result was in **Supplementary Figure 1b**. We note that the XRD spectrum only exhibited pure W peaks, which proved that the H<sub>2</sub> gas has an inhibition effect for W-H<sub>2</sub>O reaction<sup>2</sup>. However, it is noteworthy that when the percentage of H<sub>2</sub> is low (e.g., 1% as shown in **Supplementary Figure 2**), the W metal turned black and was covered with WO<sub>2</sub> after the annealing. Because the reaction (1) and (2) are reversible,

reducing hydrogen (or equivalently adding sulfur precursors) shall drive the reactions toward the left, leading to the formation of tungsten-oxides like  $\text{WO}_2$ ,  $\text{WO}_3$ ,  $\text{W}_{18}\text{O}_{49}$ , or  $\text{WO}_2(\text{OH})_2$ . Since  $\text{WO}_2(\text{OH})_2$  is more volatile<sup>3</sup> and  $\text{W}_{18}\text{O}_{49}$  is the most refractory tungsten oxide<sup>3</sup>, the dominated species observed after the entire reaction should be  $\text{W}_{18}\text{O}_{49}$ , as shown in **Supplementary Figure 1a**.

### **Supplementary Note 2: PL and Raman mapping results.**

To present the sample homogeneity, PL and Raman mapping of  $2 \times 2 \text{ mm}^2$   $\text{WS}_2$  film were performed as shown in **Supplementary Figure 4**. By using a 488 nm excitation laser, the  $E_{2g}$  and  $A_{1g}$  Raman modes of  $\text{WS}_2$  are easier to clarify during the mapping process. As shown in **Supplementary Figure 4b and c**, the average intensity ratio of  $I_{E_{2g}}/I_{A_{1g}}$  is 0.7, and the average frequencies difference between  $E_{2g}$  and  $A_{1g}$  is  $61.5 \text{ cm}^{-1}$  which corresponds to  $\text{WS}_2$  monolayer thickness.<sup>4</sup> PL intensity and peak position mapping images (**Supplementary Figure 4d and e**) show that the average emission peak position of the film is around 620 nm (2 eV) with identical PL intensity. It is hard to avoid seeds and multilayer growth in the large-scale deposition process (**Supplementary Figure 4f**), so a small quantity of brighter or darker dots can be found in the mapping image. Similar to other reports<sup>5</sup>, a higher density of multilayers and seeds would be found at the center of the film compared to the edge. Further study is needed to decrease these seeds and multilayers.

## Supplementary Note 3: Discussion of OHVPD growth condition.

### 1. Temperature gradient of the substrate

**Supplementary Figure 17a** shows the temperature gradient of our single-heating zone furnace when the heating temperature is set at 1050°C. The position marked as 0 cm corresponds to the center of the furnace. The substrates were distanced from the center by 9 to 14 cm (the temperature range is around 950-800°C). **Supplementary Figure 17b** presents the typical PL peaks of OHVPD-WS<sub>2</sub> collected from different temperature regions. It is evident that the PL peaks of WS<sub>2</sub> film had a redshift when the substrate was put in a higher temperature region (region A). Given that very limited defective and doping variations are concluded from the low-temperature PL and STM results, the possible explanation is that the OHVPD-WS<sub>2</sub> film grown in a higher temperature zone contains higher tensile strain, which results in a PL peak redshift.<sup>6</sup> On the other hand, as concluded in **Supplementary Note 2**, the temperature gradient does not lead to noticeable variation in morphology and thickness of samples because the OHVPE method provides more volatile W-OH reactants that are not hampered by large temperature drops.

### 2. Water concentration effect

We adopted a bubbler set up to introduce the water vapor into the growth chamber as shown in **Supplementary Figure 18a**. During the experiment, we fixed the carrier gas flow of Ar and adjusted the water temperature using a thermal bath to change the water vapor concentration. By using Antoine equation<sup>7</sup>, the partial pressure of water ( $p_{H_2O}$ ) could be estimated. **Supplementary Figure 18b-d** show the OHVPD-WS<sub>2</sub> growth results with various  $p_{H_2O}$ . High  $p_{H_2O}$  (92.59 torr, 50°C) results in over oxidization during the reaction, where excess oxides can be found on as-grown samples (**Supplementary Figure 18b**).

In contrast, low  $p_{H_2O}$  (17.54 torr, 20°C) lead to a low deposition with small grains due to scarcity of metal supply (**Supplementary Figure 18c**). The optimized water temperature for WS<sub>2</sub> deposition is 35°C which provides  $p_{H_2O} = 42.20$  torr (**Supplementary Figure 18d**).

## II. Supplementary Figures

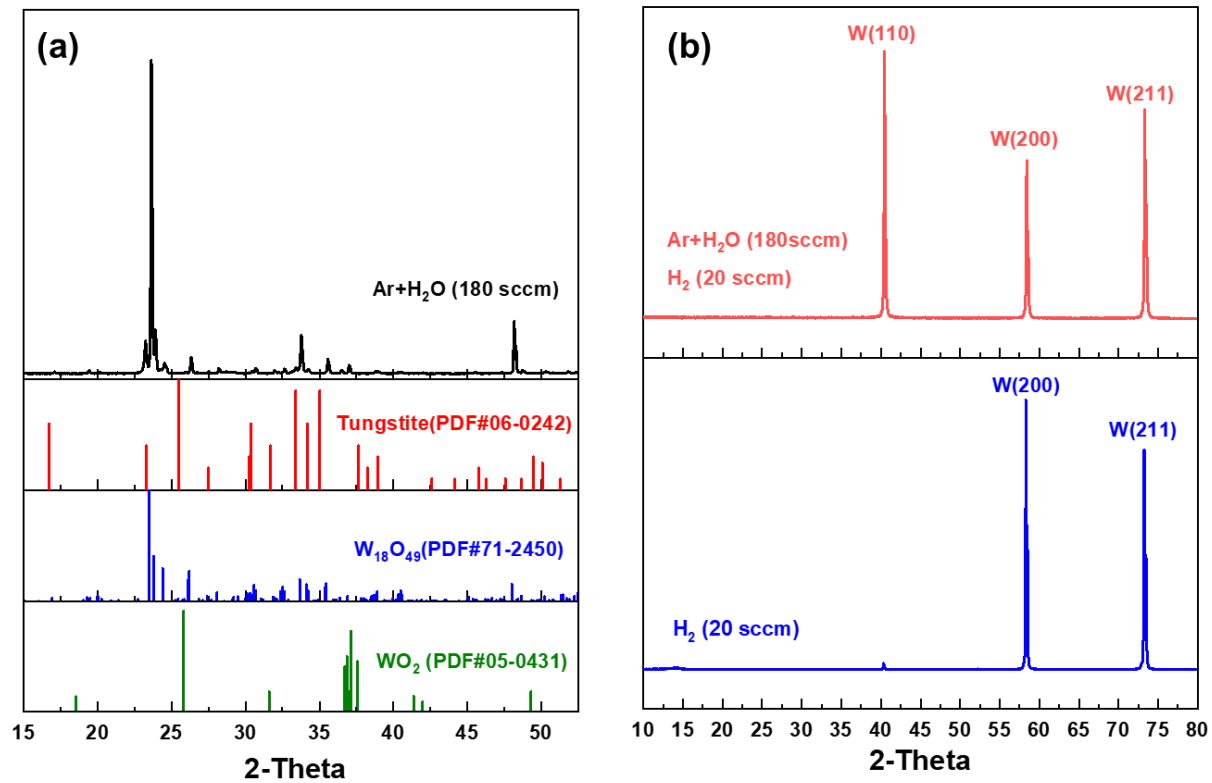

**Supplementary Figure 1.** Reaction of W metals with H<sub>2</sub>O and/or H<sub>2</sub> by XRD. (a) XRD spectrum of the W metals annealed in the environment with H<sub>2</sub>O. (b) XRD spectrum of the W metals annealed in the environment with H<sub>2</sub>O/H<sub>2</sub> and only H<sub>2</sub>.

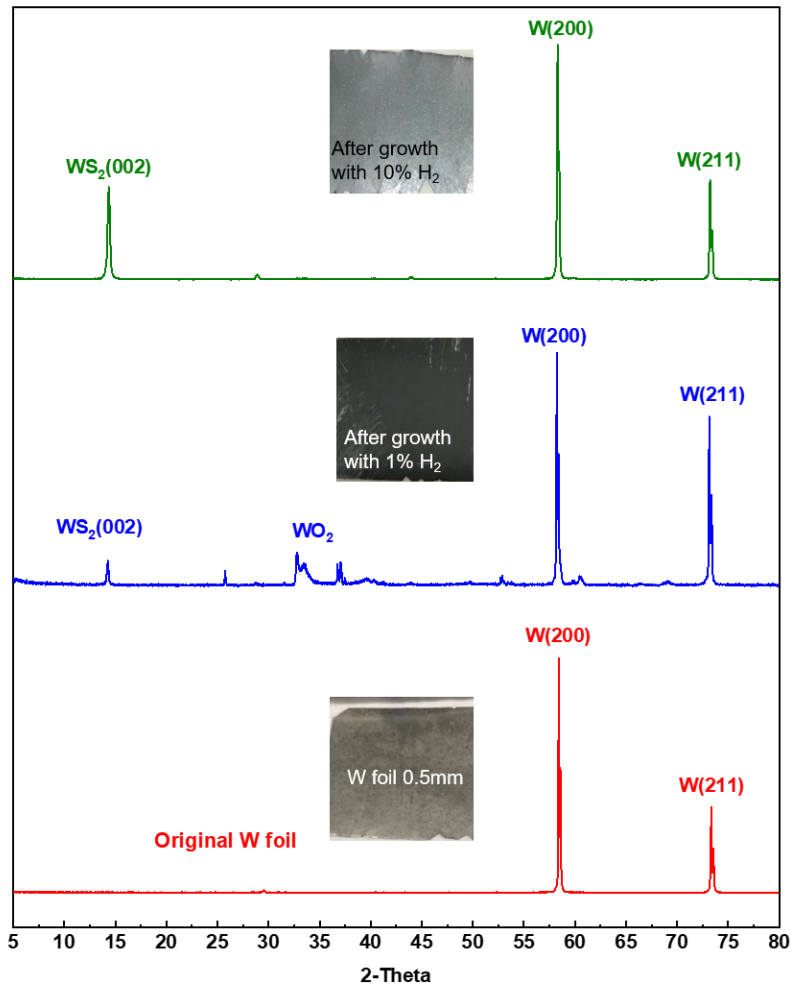

**Supplementary Figure 2.** Hydrogen effect investigation in the OHVPD process. XRD spectra were taken from the W metal after the reaction under different H<sub>2</sub> gas concentrations.



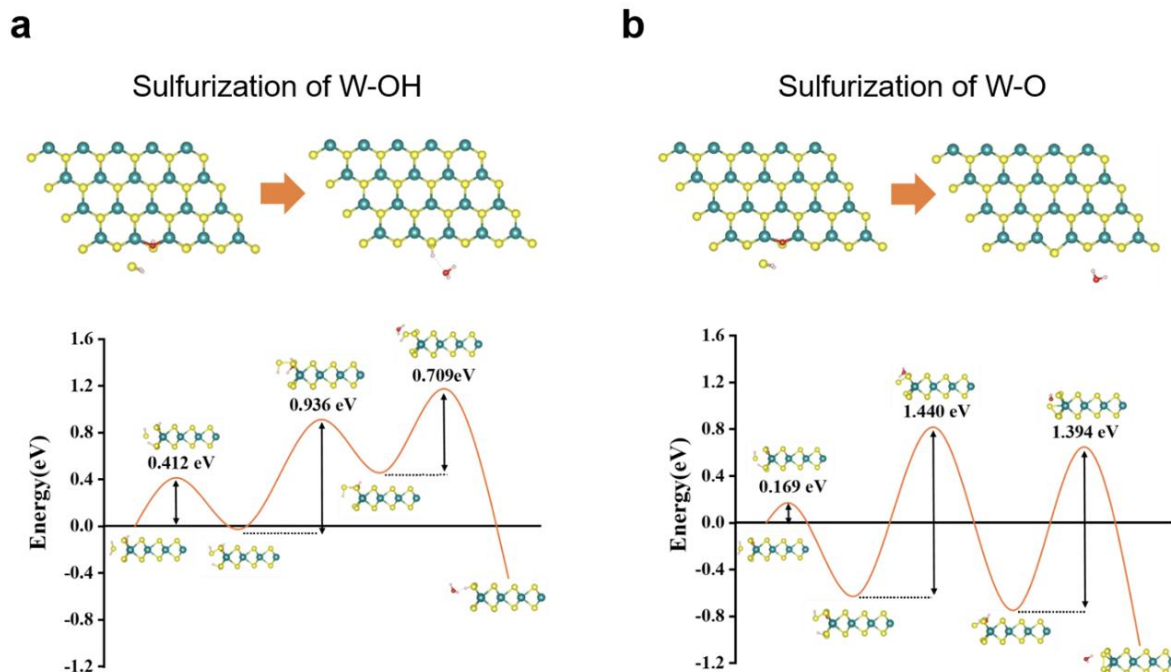

**Supplementary Figure 3.** Kinetic simulation of sulfurization process. Scheme shows the simulated kinetic energy barriers of sulfurization process for W-OH (a) and W-O (b) in  $WS_2$  crystal.

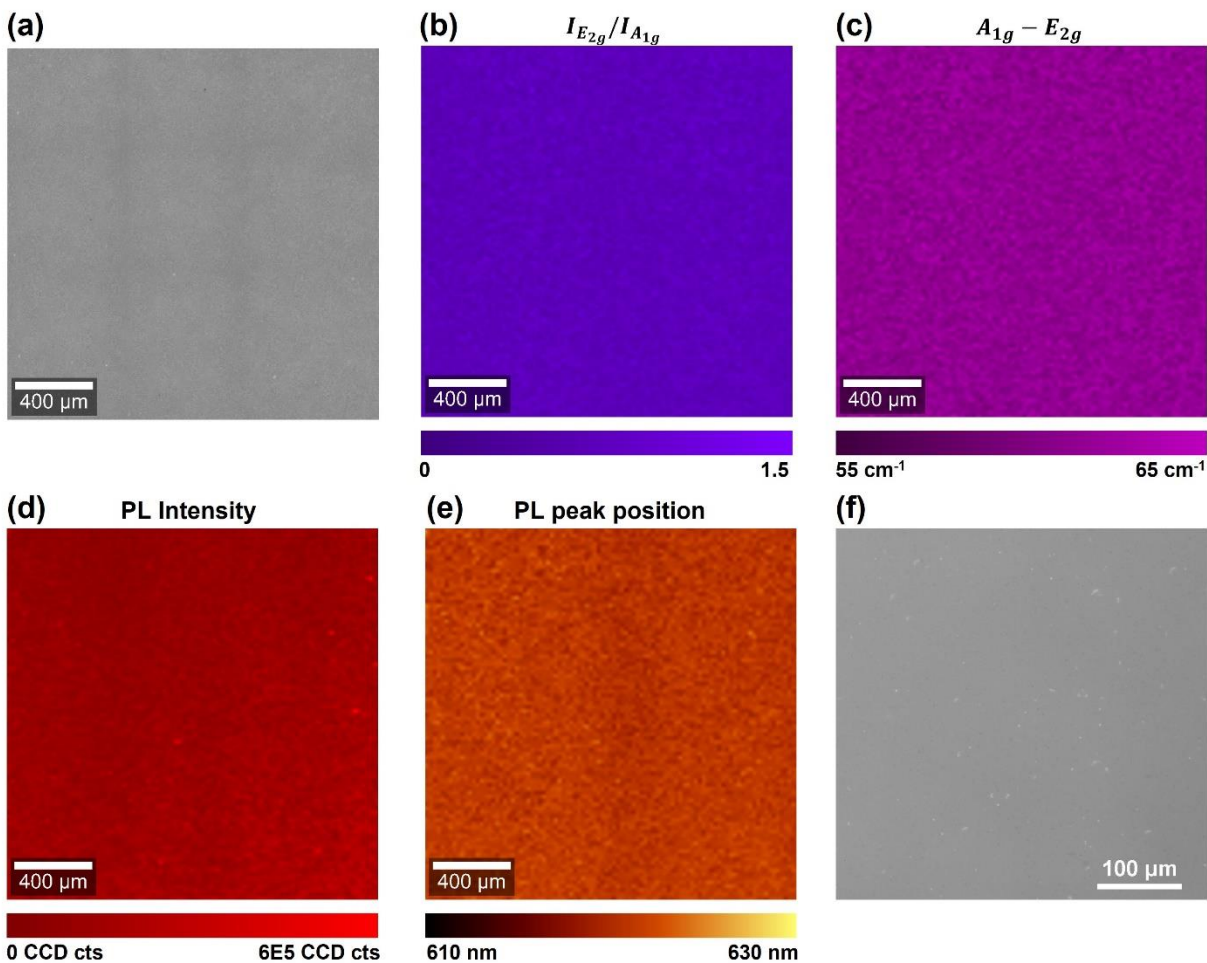

**Supplementary Figure 4.** PL and Raman mapping of OHVPD-WS<sub>2</sub> monolayer. Optical image (a), Raman mapping results (b, c), and PL mapping results (d, e) of 2 x 2 mm<sup>2</sup> OHVPD-WS<sub>2</sub> film. (f) Optical image shows small quantities of WS<sub>2</sub> seeds and multilayers.

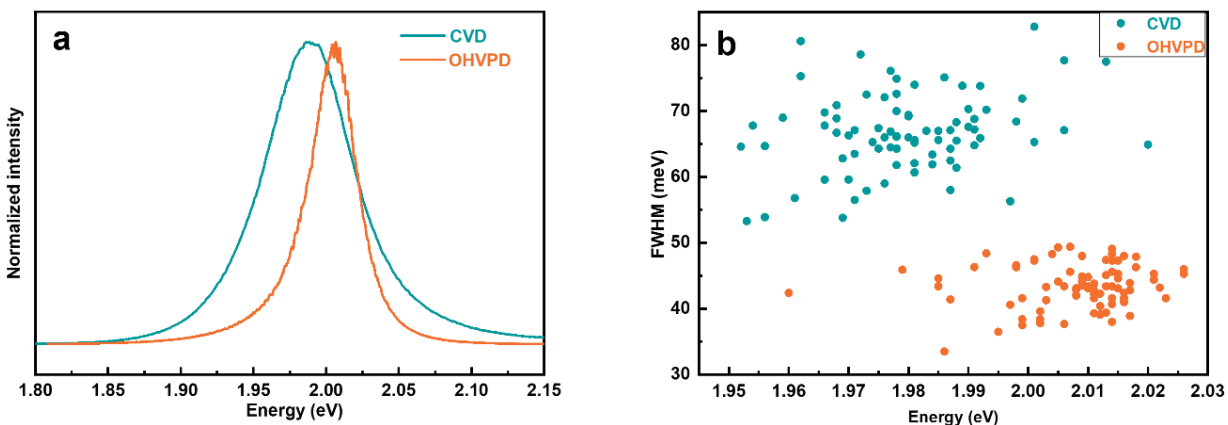

**Supplementary Figure 5.** Photoluminescence comparison between CVD- and OHVPD-WS<sub>2</sub> monolayers. (a), Typical PL spectra of OHVPD- and CVD- WS<sub>2</sub> monolayers taken at room temperature. (b), Statistic results of PL peak energy and FWHM for OHVPD- and CVD-WS<sub>2</sub> monolayers. For each case, we display a statistical summary of PL spectra for at least 50 single crystal flakes from different growth batches.

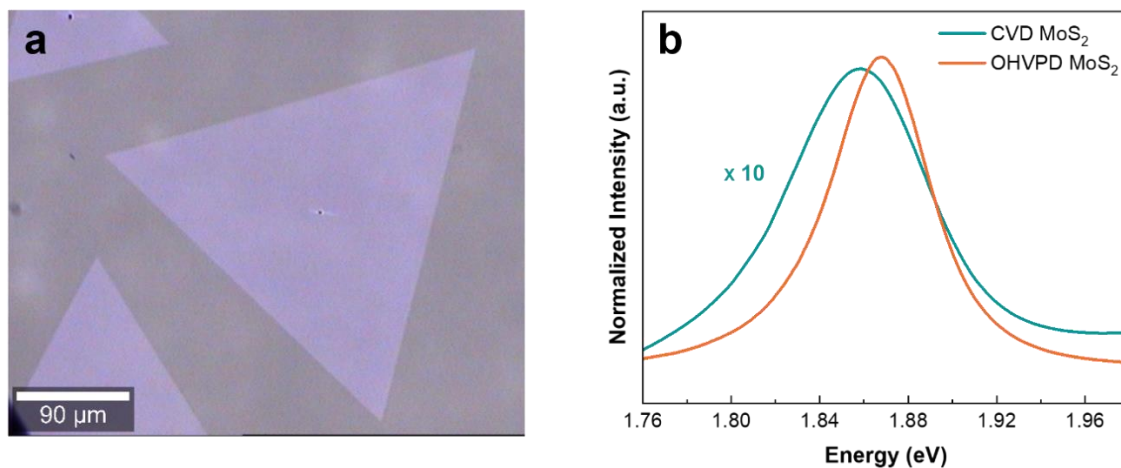

**Supplementary Figure 6.** OHVPD-MoS<sub>2</sub>. (a) Optical image of OHVPD-MoS<sub>2</sub> monolayers. (b) Typical room temperature PL spectra of OHVPD- and CVD-MoS<sub>2</sub>.

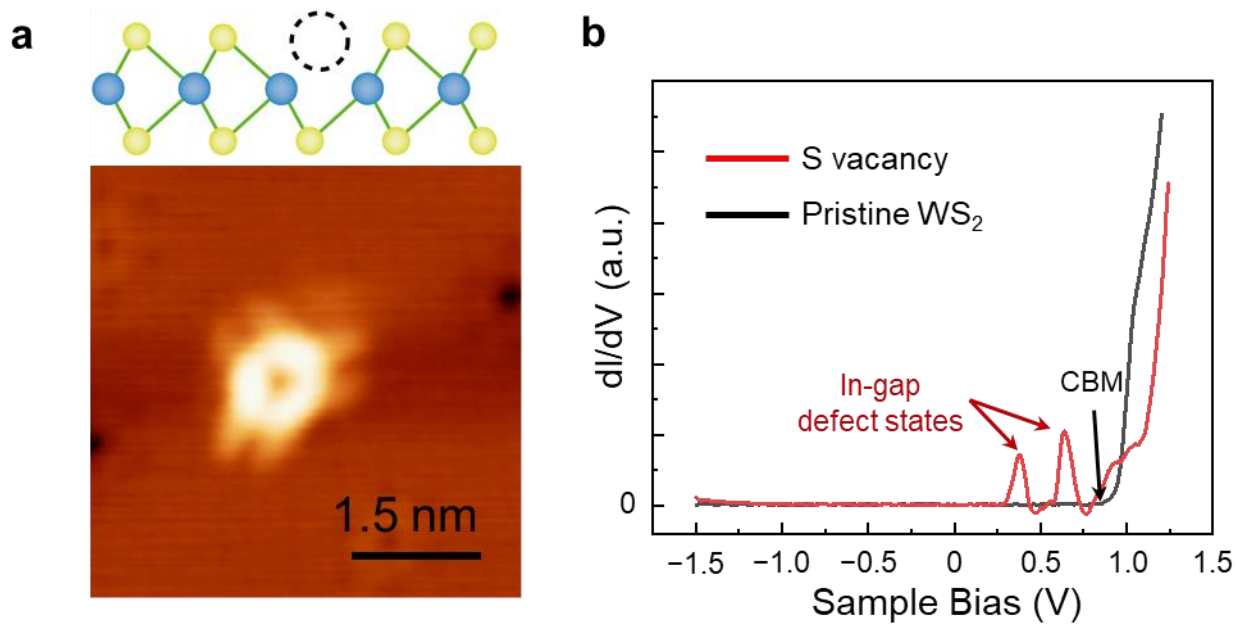

**Supplementary Figure 7.** STM/STS for sulfur vacancy. (a) Top: a schematic side view of a sulfur vacancy structure. Bottom: an STM topographic image ( $V=1.1\text{V}$ ,  $I=40\text{pA}$ ) of sulfur vacancy point defect in CVD- $\text{WS}_2$  samples. (b)  $dI/dV$  spectrums acquired at the center of sulfur vacancy (red curve) and pristine  $\text{WS}_2$  region (black curve), showing two narrow unoccupied in-gap defect states below the CBM at the sulfur vacancy.

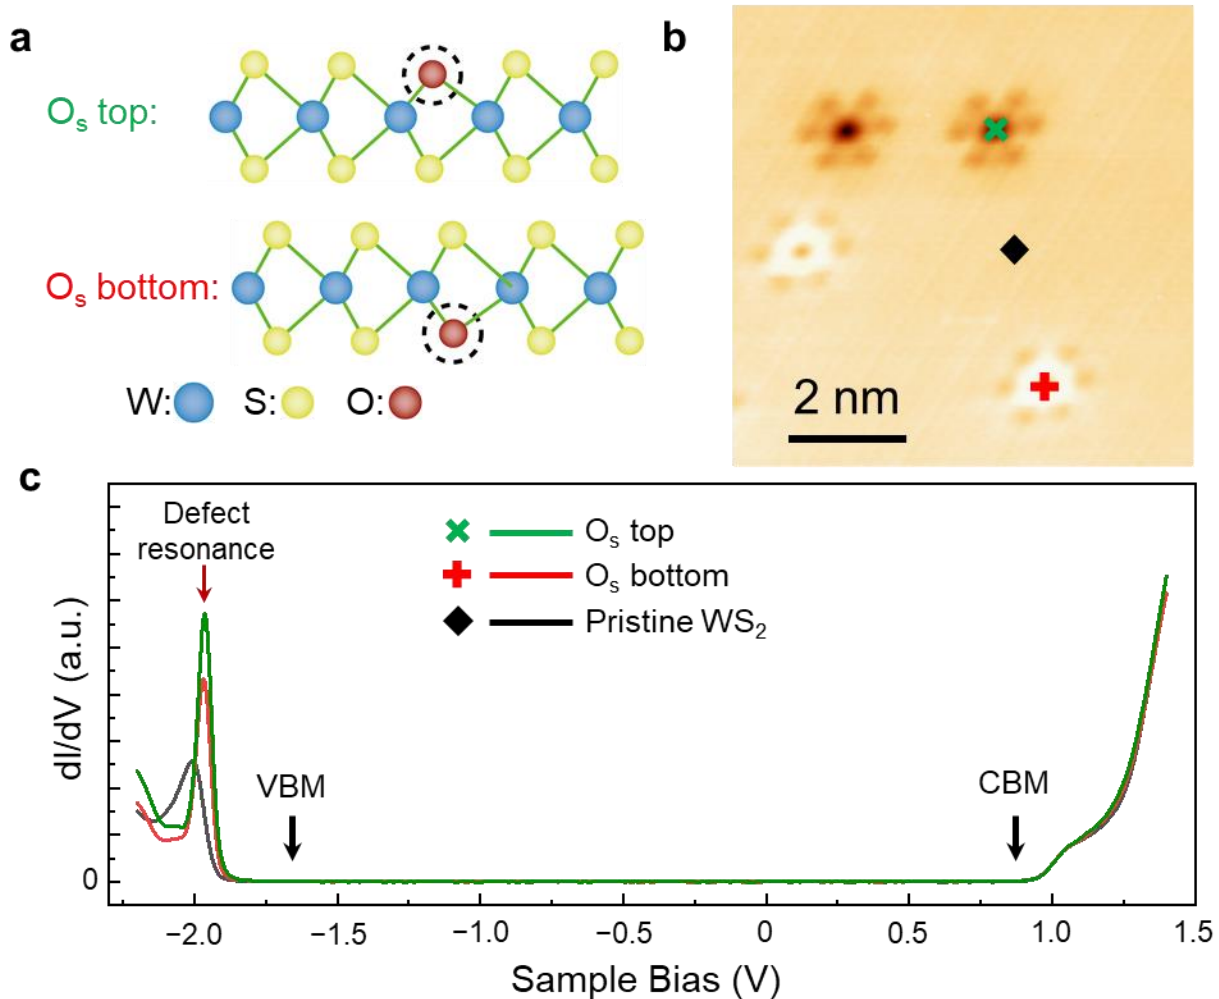

**Supplementary Figure 8.** STM/STS for  $O_s$  defect. (a) A schematic side view of oxygen substituting sulfur ( $O_s$ ) in the top and bottom sulfur plane. (b) A typical STM image ( $V=1.3V$ ,  $I=30pA$ ) of as-grown monolayer  $WS_2$  with  $O_s$  top and  $O_s$  bottom defects. (c)  $dI/dV$  spectrums recorded on  $O_s$  top (green),  $O_s$  bottom (red) defect, and pristine site (black) as marked in (b). The  $O_s$  defects show an equivalent bandgap to pristine  $WS_2$  and a defect resonance deep inside the valence band, lacking of deep in-gap states.

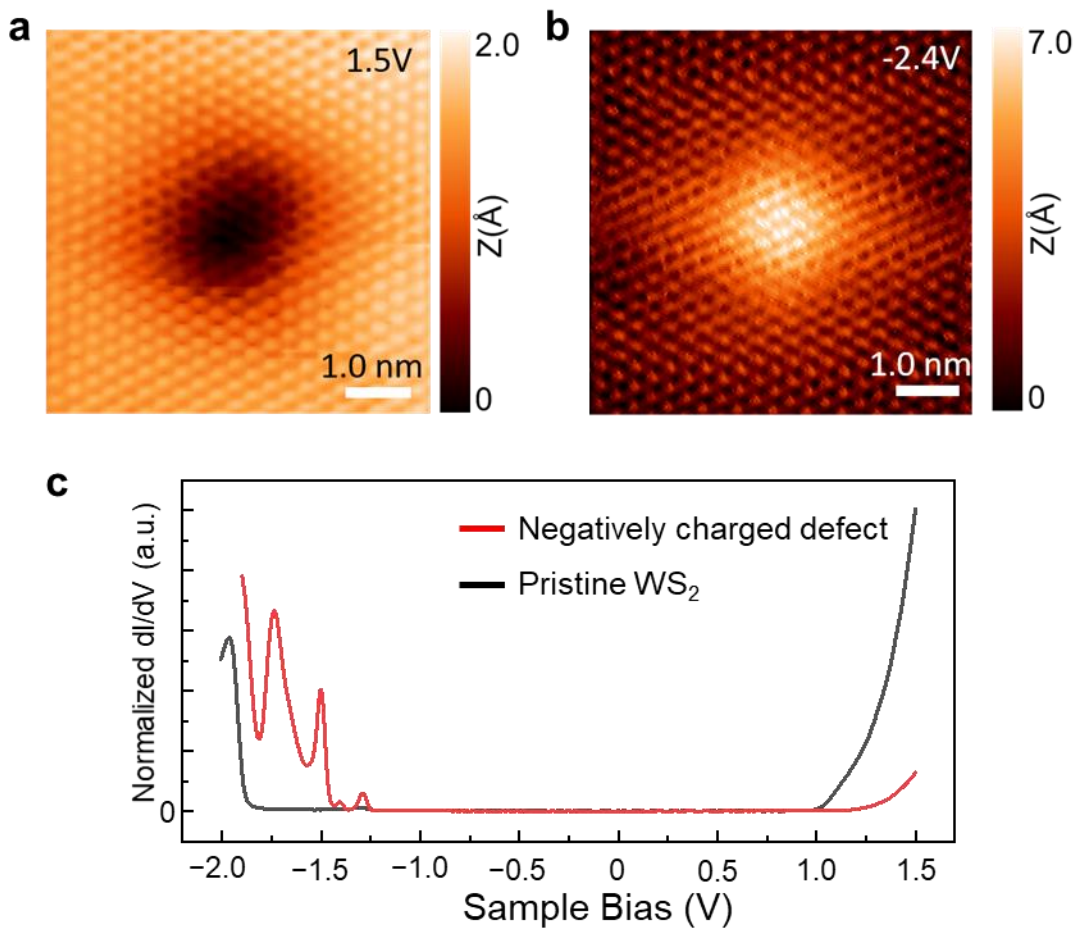

**Supplementary Figure 9.** STM/STS for negatively charged defect (NCD). (a) (b) Bias-dependent STM images of the NCD, appearing as a large depression at positive sample bias and a large protrusion at negative bias. (c)  $dI/dV$  spectrums on an NCD (red) and the pristine WS<sub>2</sub> (black), showing additional electronic resonances at negative sample bias.

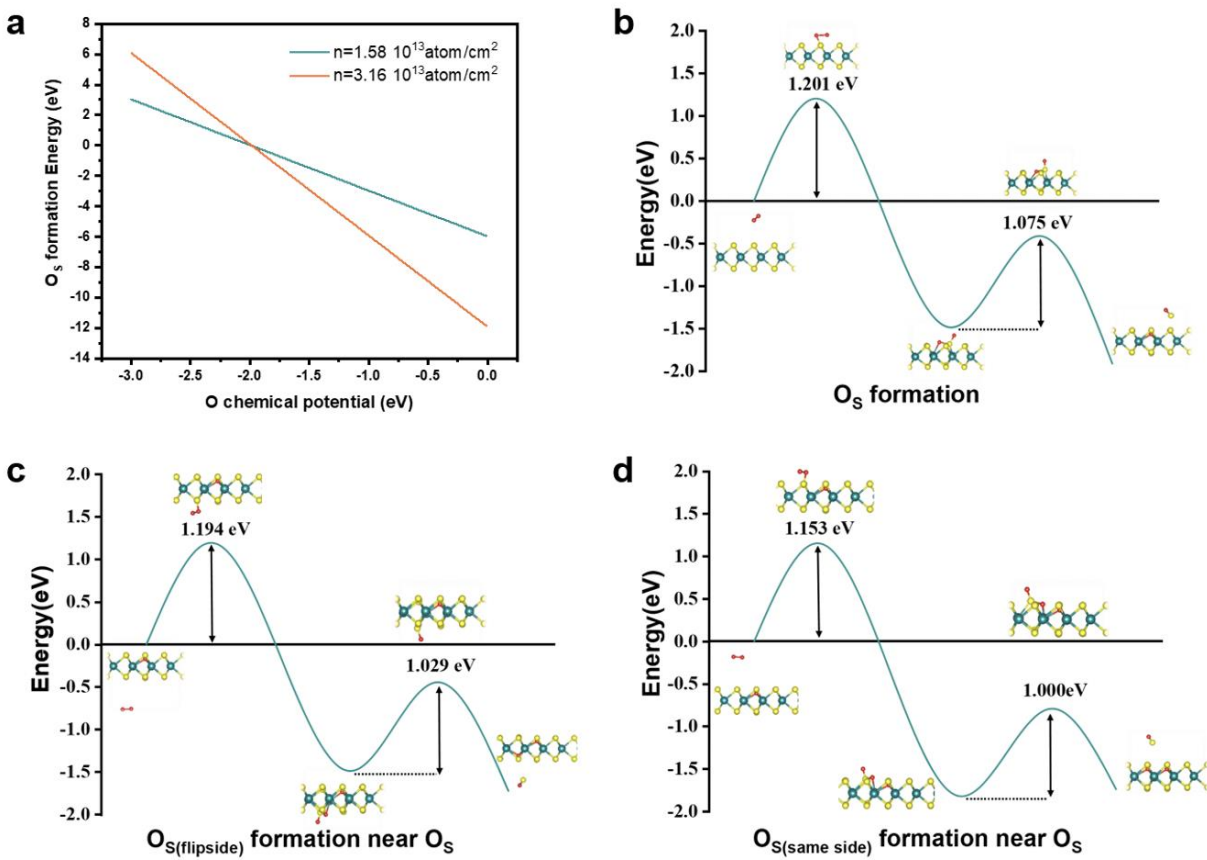

**Supplementary Figure 10.** Simulation of  $O_S$  defect formation. (a) Formation energy of O substituted by S ( $O_S$ ) versus the chemical potential of O for two different  $O_S$  density. Reaction pathway and kinetic energy barriers of the  $O_2$  dissociation and forming one  $O_S$  defect on the (b) pristine  $WS_2$  crystal, (c) flipside near  $O_S$  and (d) same side near  $O_S$ .

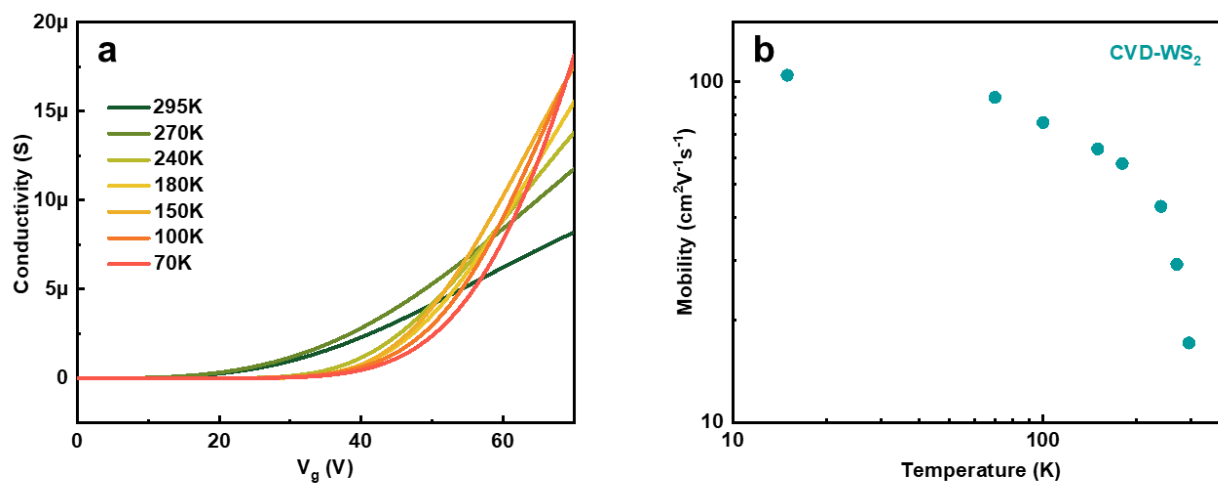

**Supplementary Figure 11.** Electrical performance of CVD- $\text{WS}_2$  monolayers. (a) Four-probe conductivity as a function of  $V_g$  for two cases of CVD- $\text{WS}_2$  monolayer device on the 300nm  $\text{SiO}_x$  substrate at different temperatures. (b) Electron field effect mobility of the corresponding CVD- $\text{WS}_2$  samples.



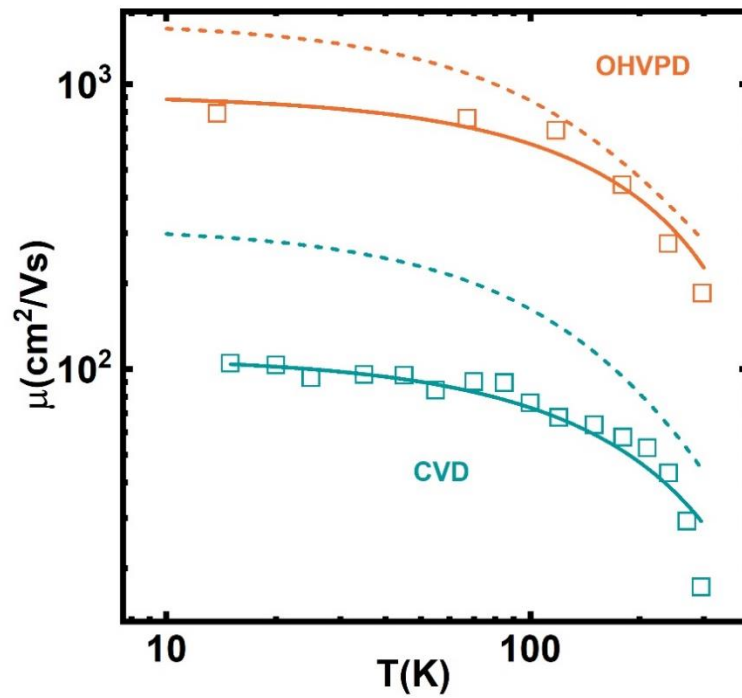

**Supplementary Figure 12.** Theoretical fitting of  $\mu$ - $T$  characteristic for OHVPD- and CVD- $\text{WS}_2$  devices under  $n = 4.3 \times 10^{12} \text{ cm}^{-2}$ . The squares are the experimental results. Solid lines are the best theoretical fitting as describe in the Method. The dashed lines are the calculated CI-dominated mobility.

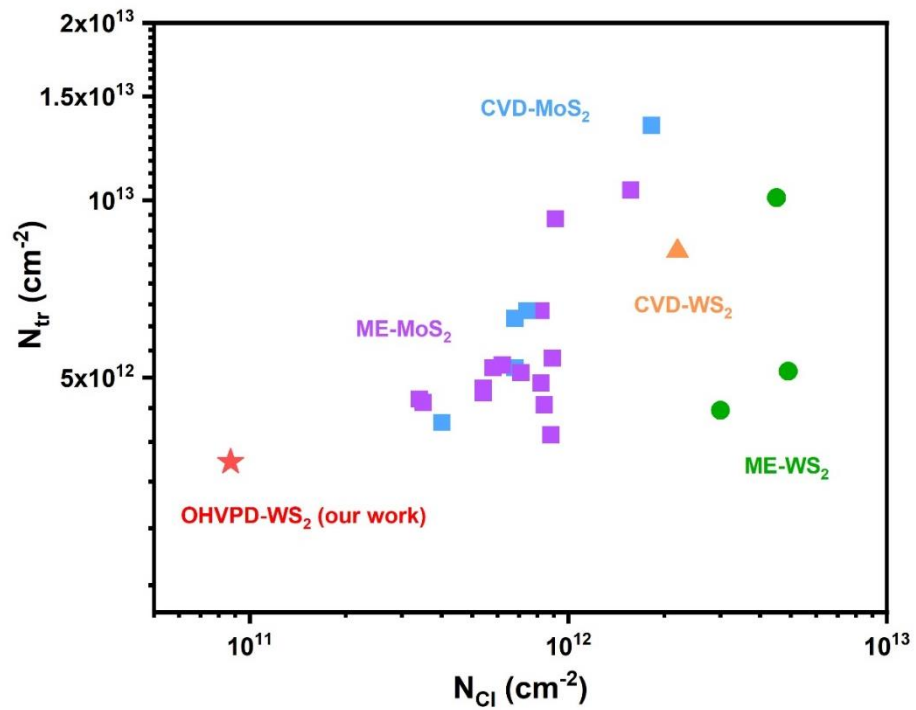

**Supplementary Figure 13.** Summary of reported  $N_{tr}$  and  $N_{Cl}$  for MoS<sub>2</sub> and WS<sub>2</sub> monolayers with different fabrication technologies. The red star represents for our OHVPD-WS<sub>2</sub> shows the lowest  $N_{Cl}$  as well as the lowest  $N_{tr}$  due to its relatively low defect density. (References are listed in Supplementary Table 1)

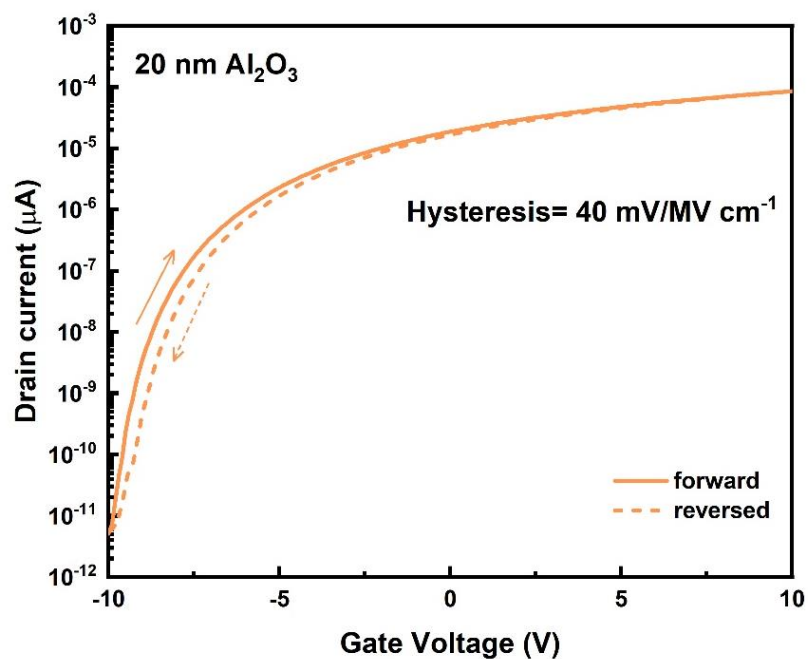

**Supplementary Figure 14.** Typical dual-sweep transfer curve characteristics of OHVPD-WS<sub>2</sub> monolayer device.

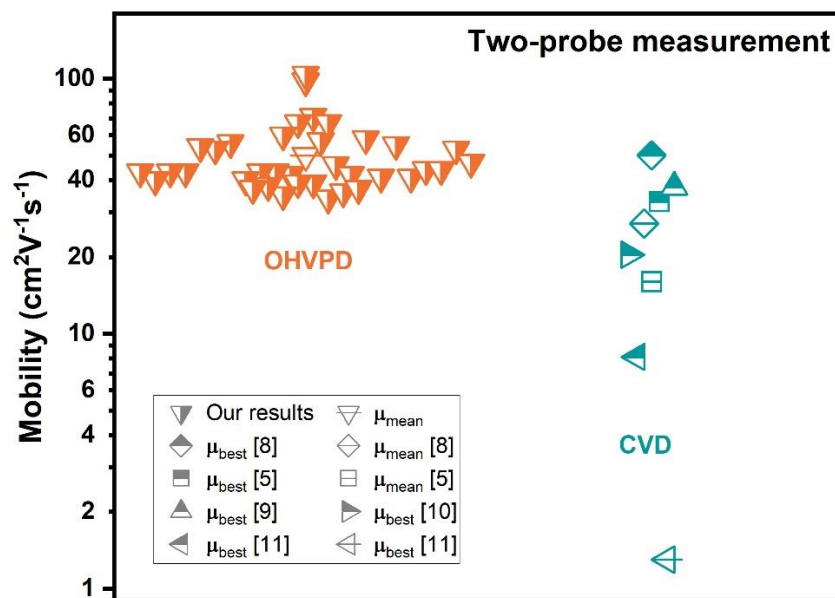

**Supplementary Figure 15.** Benchmarking field-effect mobility for  $\text{WS}_2$  monolayers based on two-probe measurements.<sup>5,8-11</sup> The points with centerline interior represent the mean value.

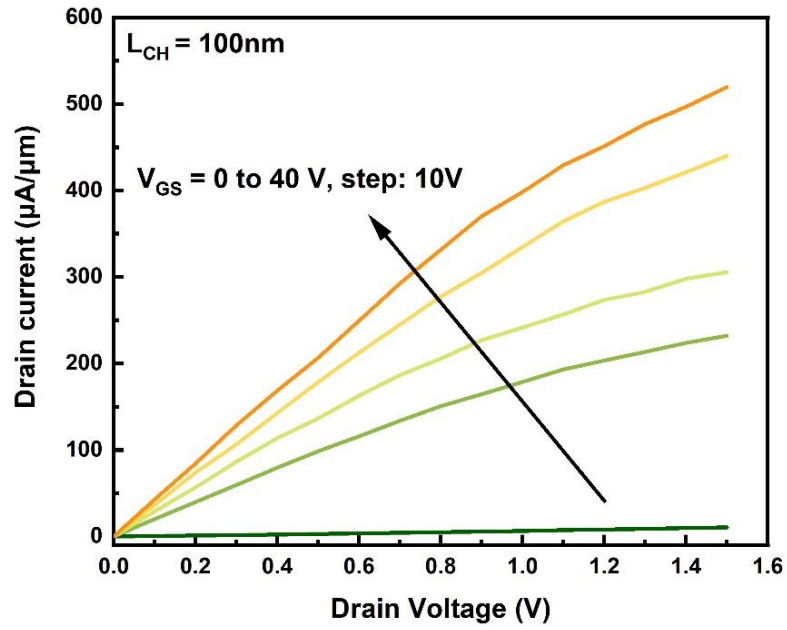

**Supplementary Figure 16.** The output characteristics of the short-gate-length (100 nm) FET based on OHVPD-WS<sub>2</sub>.

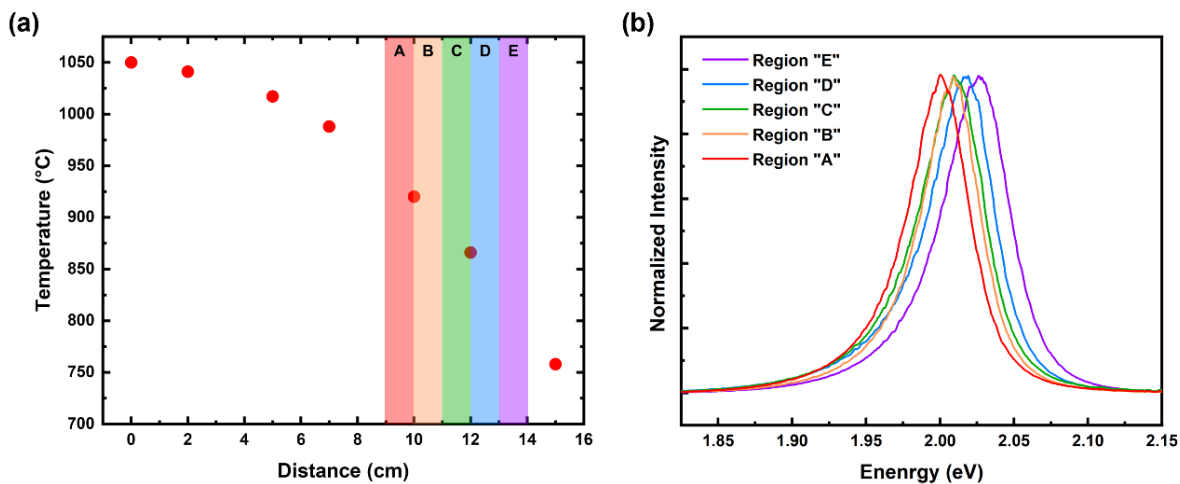

**Supplementary Figure 17.** Temperature and PL distributions. (a) Temperature profile of our single-heating zone furnace. (Setting temperature is 1050°C) (b) PL spectrums of OHVPD-WS<sub>2</sub> film from different regions.

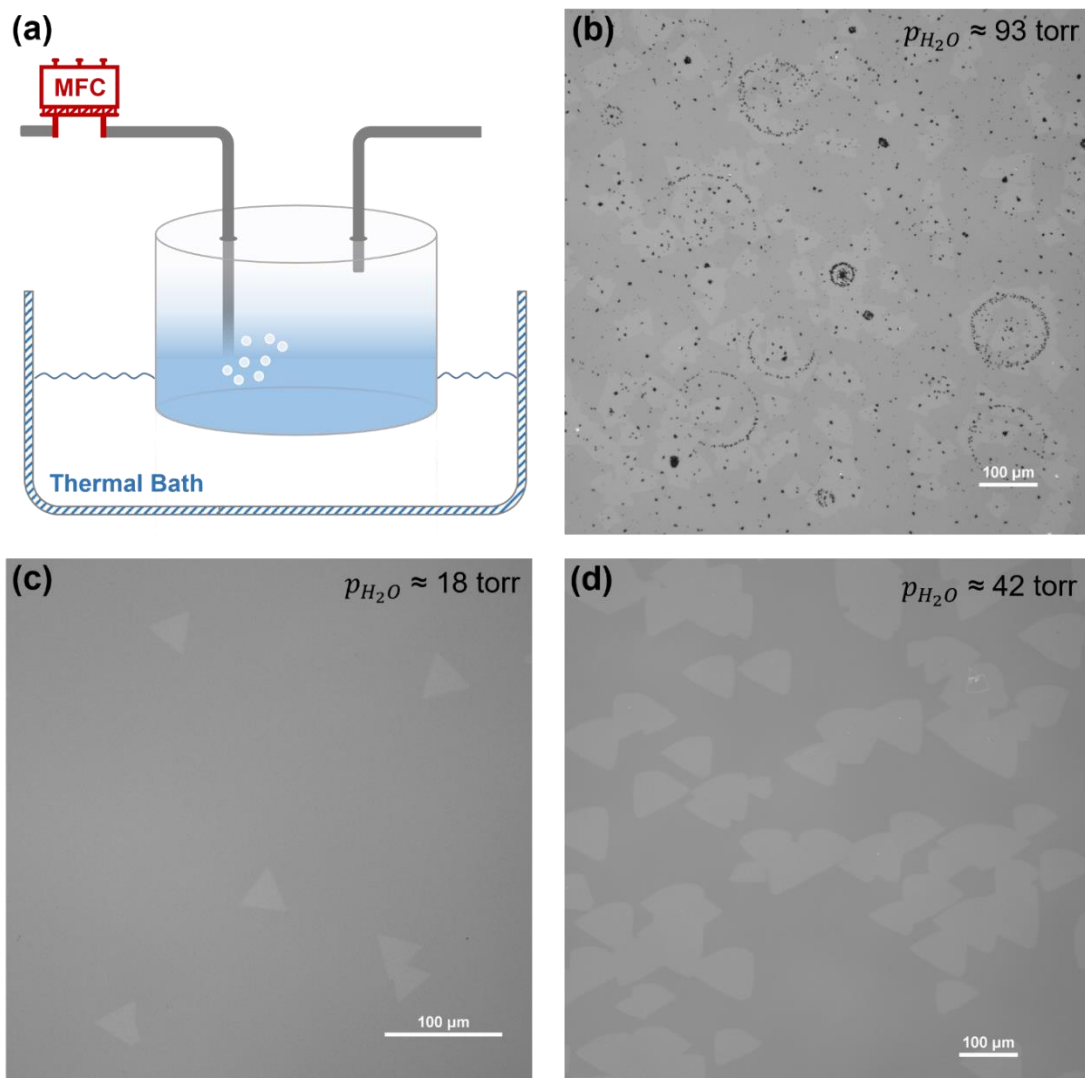

**Supplementary Figure 18.** Water vapor supply influence. (a) Schematic illustration of our bubbler set up for water vapor supply. Optical images of OHVPD-WS<sub>2</sub> growth results under (b) high  $p_{H_2O}$  (92.59 torr, 50°C), (c) low  $p_{H_2O}$  (17.54 torr, 20°C), and (d) optimized  $p_{H_2O}$  (42.20 torr, 35°C).

### III. Supplementary Tables

**Supplementary Table 1.** Benchmarking FET performance of monolayer TMDCs.

| Channel             | Growth method           | Electrode | Dielectric                     | Room temperature mobility [cm <sup>2</sup> V <sup>-1</sup> s <sup>-1</sup> ] | N <sub>tr</sub> (10 <sup>12</sup> cm <sup>-2</sup> ) | N <sub>Cl</sub> (10 <sup>12</sup> cm <sup>-2</sup> ) | Ref. |    |
|---------------------|-------------------------|-----------|--------------------------------|------------------------------------------------------------------------------|------------------------------------------------------|------------------------------------------------------|------|----|
| 1L-MoS <sub>2</sub> | MPS-ME-MoS <sub>2</sub> | Ti/Pd     | Al <sub>2</sub> O <sub>3</sub> | 113                                                                          | 4.5                                                  | 0.84                                                 | 12   |    |
|                     |                         |           |                                | 101                                                                          | 4.0                                                  | 0.88                                                 | 12   |    |
|                     |                         |           | HfO <sub>2</sub>               | 125                                                                          | 5.4                                                  | 0.89                                                 | 12   |    |
|                     |                         |           |                                | 149                                                                          | 4.9                                                  | 0.82                                                 | 12   |    |
|                     |                         |           | SiO <sub>2</sub>               | 34                                                                           | 6.5                                                  | 0.82                                                 | 13   |    |
|                     |                         |           |                                | 81                                                                           | 5.1                                                  | 0.71                                                 | 13   |    |
|                     | ME-MoS <sub>2</sub>     | MLG       | t-BN/SiO <sub>2</sub>          | 62                                                                           | 4.8                                                  | 0.54                                                 | 14   |    |
|                     |                         |           |                                | 62                                                                           | 4.72                                                 | 0.54                                                 | 14   |    |
|                     |                         |           | d-BN/SiO <sub>2</sub>          | 96                                                                           | 4.6                                                  | 0.34                                                 | 14   |    |
|                     |                         |           |                                | 84                                                                           | 4.54                                                 | 0.35                                                 | 14   |    |
|                     |                         |           | SiO <sub>2</sub>               | 72                                                                           | 5.2                                                  | 0.58                                                 | 14   |    |
|                     |                         |           |                                | 55                                                                           | 5.25                                                 | 0.62                                                 | 14   |    |
|                     |                         |           | Ti/Pd                          | SiO <sub>2</sub>                                                             | 23                                                   | 9.3                                                  | 0.91 | 13 |
|                     |                         |           | Cr/Au                          | t-HfO <sub>2</sub>                                                           | 66                                                   | 10.4                                                 | 1.57 | 15 |



|                                |                           |                    |                                  |                  |      |       |          |
|--------------------------------|---------------------------|--------------------|----------------------------------|------------------|------|-------|----------|
|                                |                           | -                  | t-HfO <sub>2</sub>               | 48               | -    | 2.5   | 16       |
|                                |                           | -                  | SiO <sub>2</sub>                 | 20               | -    | 1.5   | 16       |
|                                | MOCVD-MoS <sub>2</sub>    | Ti/Au              | SiO <sub>2</sub>                 | 30               | 5.2  | 0.68  | 17       |
|                                | CVD-MoS <sub>2</sub>      | MLG                | d-BN/SiO <sub>2</sub>            | 65               | 4.2  | 0.4   | 18       |
|                                |                           | Au                 | SiO <sub>2</sub>                 | 65.3             | 6.5  | 0.74  | 19       |
|                                |                           |                    |                                  | 66.4             | 6.3  | 0.68  | 20       |
|                                |                           |                    |                                  | 4.03             | -    | 22.3  | 21       |
|                                |                           |                    | t-Al <sub>2</sub> O <sub>3</sub> | 24               | 13.4 | 1.82  | 22       |
|                                | SAMs-CVD-MoS <sub>2</sub> | Au                 | SiO <sub>2</sub>                 | 42.2             | -    | 3.6   | 21       |
|                                | 1L-WS <sub>2</sub>        | ME-WS <sub>2</sub> | Ti/Pd                            | SiO <sub>2</sub> | 25   | 10.1  | 4.5      |
| Al <sub>2</sub> O <sub>3</sub> |                           |                    |                                  | 49               | 5.13 | 4.9   | 23       |
|                                |                           |                    | 83                               | 4.4              | 3.0  | 23    |          |
| -                              |                           | SiO <sub>2</sub>   | 40                               | -                | 1.35 | 16    |          |
| CVD-WS <sub>2</sub>            |                           | Al/Au              | SiO <sub>2</sub>                 | 17               | 8.2  | 2.2   | our work |
| OHVPD-WS <sub>2</sub>          |                           | Al/Au              | SiO <sub>2</sub>                 | 198              | 3.6  | 0.087 | our work |

#### IV. Supplementary References

- 1 Kilpatrick, M. & Lott, S. K. Reaction of flowing steam with refractory metals: III. Tungsten (1000–1700 C). *Journal of the Electrochemical Society* **113**, 17 (1966).
- 2 Sabourin, J. L. & Yetter, R. A. High-Temperature Oxidation Kinetics of Tungsten-Water Reaction with Hydrogen Inhibition. *Journal of Propulsion and Power* **27**, 1088-1096, doi:10.2514/1.B34093 (2011).
- 3 CHANG, L. L. Y. & PHILLIPS, B. Phase Relations in Refractory Metal-Oxygen Systems. *Journal of the American Ceramic Society* **52**, 527-533, doi:<https://doi.org/10.1111/j.1151-2916.1969.tb09158.x> (1969).
- 4 Berkdemir, A. *et al.* Identification of individual and few layers of WS<sub>2</sub> using Raman Spectroscopy. *Scientific Reports* **3**, 1755, doi:10.1038/srep01755 (2013).
- 5 Sebastian, A., Pendurthi, R., Choudhury, T. H., Redwing, J. M. & Das, S. Benchmarking monolayer MoS<sub>2</sub> and WS<sub>2</sub> field-effect transistors. *Nature Communications* **12**, 693, doi:10.1038/s41467-020-20732-w (2021).
- 6 Chang, C.-H., Fan, X., Lin, S.-H. & Kuo, J.-L. Orbital analysis of electronic structure and phonon dispersion in MoS<sub>2</sub>, MoSe<sub>2</sub>, WS<sub>2</sub>, and WSe<sub>2</sub> monolayers under strain. *Physical Review B* **88**, 195420, doi:10.1103/PhysRevB.88.195420 (2013).
- 7 Lide, D. R. *CRC handbook of chemistry and physics*. Vol. 85 (CRC press, 2004).
- 8 Aji, A. S., Solís - Fernández, P., Ji, H. G., Fukuda, K. & Ago, H. High mobility WS<sub>2</sub> transistors realized by multilayer graphene electrodes and application to high responsivity flexible photodetectors. *Advanced Functional Materials* **27**, 1703448 (2017).
- 9 Yue, Y. *et al.* Two-Dimensional High-Quality Monolayered Triangular WS<sub>2</sub> Flakes for Field-Effect Transistors. *ACS Applied Materials & Interfaces* **10**, 22435-22444, doi:10.1021/acsami.8b05885 (2018).
- 10 Yun, S. J. *et al.* Synthesis of Centimeter-Scale Monolayer Tungsten Disulfide Film on Gold Foils. *ACS Nano* **9**, 5510-5519, doi:10.1021/acsnano.5b01529 (2015).
- 11 Chen, J. *et al.* Synthesis of Wafer-Scale Monolayer WS<sub>2</sub> Crystals toward the Application in Integrated Electronic Devices. *ACS Applied Materials & Interfaces* **11**, 19381-19387, doi:10.1021/acsami.9b04791 (2019).
- 12 Yu, Z. *et al.* Analyzing the Carrier Mobility in Transition-Metal Dichalcogenide MoS<sub>2</sub> Field-Effect Transistors. *Advanced Functional Materials* **27**, 1604093, doi:<https://doi.org/10.1002/adfm.201604093> (2017).
- 13 Yu, Z. *et al.* Towards intrinsic charge transport in monolayer molybdenum disulfide by defect and interface engineering. *Nature Communications* **5**, 5290, doi:10.1038/ncomms6290 (2014).
- 14 Liu, Y. *et al.* Toward Barrier Free Contact to Molybdenum Disulfide Using Graphene Electrodes. *Nano Letters* **15**, 3030-3034, doi:10.1021/nl504957p (2015).
- 15 Radisavljevic, B. & Kis, A. Mobility engineering and a metal–insulator transition in monolayer MoS<sub>2</sub>. *Nature Materials* **12**, 815-820, doi:10.1038/nmat3687 (2013).
- 16 Lee, Y., Fiore, S. & Luisier, M. in *2019 IEEE International Electron Devices Meeting (IEDM)*. 24.24.21-24.24.24.
- 17 Kang, K. *et al.* High-mobility three-atom-thick semiconducting films with wafer-scale homogeneity. *Nature* **520**, 656 (2015).
- 18 Cui, X. *et al.* Multi-terminal transport measurements of MoS<sub>2</sub> using a van der Waals heterostructure device platform. *Nature Nanotechnology* **10**, 534-540, doi:10.1038/nnano.2015.70 (2015).
- 19 Jariwala, D. *et al.* Band-like transport in high mobility unencapsulated single-layer MoS<sub>2</sub> transistors. *Applied Physics Letters* **102**, 173107, doi:10.1063/1.4803920 (2013).

- 20 Sangwan, V. K. *et al.* Low-Frequency Electronic Noise in Single-Layer MoS<sub>2</sub> Transistors. *Nano Letters* **13**, 4351-4355, doi:10.1021/nl402150r (2013).
- 21 Wan, X. *et al.* Quantitative Analysis of Scattering Mechanisms in Highly Crystalline CVD MoS<sub>2</sub> through a Self-Limited Growth Strategy by Interface Engineering. *Small* **12**, 438-445, doi:<https://doi.org/10.1002/smll.201502392> (2016).
- 22 Sanne, A. *et al.* Top-gated chemical vapor deposited MoS<sub>2</sub> field-effect transistors on Si<sub>3</sub>N<sub>4</sub> substrates. *Applied Physics Letters* **106**, 062101, doi:10.1063/1.4907885 (2015).
- 23 Cui, Y. *et al.* High-Performance Monolayer WS<sub>2</sub> Field-Effect Transistors on High-κ Dielectrics. *Advanced Materials* **27**, 5230-5234, doi:<https://doi.org/10.1002/adma.201502222> (2015).
